# Supplementary material for: The long non-coding RNA Dreg1 is required for optimal ILC2 development
Source: eLife. 2026 May 13;15:RP109408. doi: 10.7554/eLife.109408 (PMC13171099; doi:10.7554/eLife.109408)
Supplement: Source data 1. [file elife-109408-data1.xlsx]

## Sheet: Figure 1
%	VAT				SILP				Lungs
	WT	Dreg1 KO			WT	Dreg1 KO			WT	Dreg1 KO
ILC1	1.69443	4.18955		ILC1	1.71959	1.84942		ILC1	0.525427	0.819996
	3.73359	3.05026			1.40775	2.29603			0.568592	0.732229
	1.50968	1.41359			1.55112	0.742332			0.504437	0.519516
	2.35115	1.28596			0.675789	0.259404			0.340735	0.363347
	7.1371	3.35145			1.63594	0.828114
ILC2	7.67831	3.95266		ILC2	1.39764	0.887426		ILC2
	4.73533	2.84054			1.88337	0.34302
	5.59864	4.02881			1.40208	0.367804
					8.70745	13.6611
ILC3				ILC3	6.78794	8.7089		ILC3
					7.15392	3.63213
					4.18284	4.24992
	4.77342	6.79962			0.201849	0.302434			1.71609	3.04292
NK	6.7738	3.80761		NK	0.17001	0.433266		NK	2.93478	3.78849
	4.27546	4.33967			0.221589	0.139576			3.38247	2.6422
	4.36836	6.20916			0.12082	0.0788453			1.76082	2.04685
	VAT				SILP				Lung
Chimera	WT (CD45.1)Dreg1KO (CD45.2)			Chimera	WT (CD45.1)Dreg1KO (CD45.2)			Chimera	WT (CD45.1)Dreg1KO (CD45.2)
	9	1.04			10.2	1.5			3.59	0.53
	11.6	4.7			5.63	1.5			3.47	0.78
	24.9	2.84			4.39	2.48			1.9	0.58
	12.3	5.6			17.9	0.22			2.77	0.98
ILC2	15.8	9.16			8.15	1.58			1.28	0.79
	10.6	5.56			15.9	6.29			1.48	0.51
	8.26	5.04			11.2	1.17			1.49	0.45
	12.3	3.13			10.4	7.74			1.54	0.17
	15.3	3.22			9.49	3.04			4	0.52
	11.6	5.4			8.01	2.93			2.15	0.58
	13.1	3.84			6.74	2.27			3.4	0.53
	31.5	46			40.7	59.4			52.1	67.8
	19.2	17.2			57.1	52.7			43.5	45.8
	28.8	22.2			44.9	38.5			63.7	58.9
	7.53	17			25.9	26.8			24.8	59.3
B cells	4.09	8.35			18.5	30.1			30.8	63.6
	16.1	31			10.3	17.4			39.8	62.9
	21.1	28.9			48.5	52.8			43.3	56.2
	26.9	27.1			41.4	48.8			54.7	50.1
	17	14.3			50.1	50.1			59	59.3
	19	18.4			23.9	23.9			47.9	60.7
	21.7	30.5			47.9	47.9			47.7	66.9

## Sheet: Figure 2
Bone marrow	Percentages			Total numbers			Gata3 MFI
	WT	Dreg1 KO		WT	Dreg1 KO		WT	Dreg1 KO
	0.0905969	0.151557		587.43	938.727
CLP	0.0757942	0.168683		480.728	1489.95
	0.202179	0.185673		1415.23	1368.82
		0.124012			901.604
	0.29604	0.29336		1919.52	1817.04
LMPP	0.29319	0.714371		1859.57	6309.96
	0.424351	0.464503		2970.42	3424.42
		0.408443			2969.49
CILP	0.0235662	0.0337797		195.085	288.022
	0.0195705	0.0300381		169.64	337.371
	0.0270756	0.0419558		234.845	429.074
		0.0375915			363.751
CHILP	1.03118	1.62328		6686.2	10054.4		535	578
	0.784405	1.57727		4975.13	13931.8		614	398
	1.43897	2.60888		10072.6	19233.3		486	331
		1.13392			8229.95			480
ILCP	0.0330524	0.0592369		452.59	840.614		1075	645
	0.0336794	0.0689295		483.222	1279.63		636	481
	0.0622362	0.0650999		896.557	1105.64		490	477
		0.0514861			824.835		610	495
ILC2P	1.49892	0.912345		9719.02	5650.96		4382	4415
	1.49576	0.966332		9486.91	8535.51		3681	3881
	1.31192	0.663092		9183.34	4888.47		4252	3880
		0.716411			5199.67			3883
